# Supplementary material for: Cord blood NK cells engineered to express IL-15 and a CD19-targeted CAR show long-term persistence and potent antitumor activity
Source: Springer Nature journal article supplement (doi:10.1038/leu.2017.226), 2017-07-20

**Supplementary Fig 2. CLL patient-derived NK cells transduced with iC9/CAR.19/IL15 have limited cytotoxicity against primary autologous CLL targets.** (A) Lysis of autologous CLL targets by peripheral blood NK cells from CLL patients (CLL CD19.CAR NK cells; solid purple line) compared to ex vivo expanded NT CLL-derived NK cells (CLL NT-NK cells; purple broken line; n=3; asterix indicates p=0.03). CAR-transduced CB NK cells (red solid line) killing of CLL targets compared to CLL CD19.CAR NK cells (solid purple line, n=3, double asterix indicates p=0.003). (B) Lysis of autologous CLL targets by CLL CD19.CAR NK cells in the presence (solid orange line) or absence of HLA class I blocking antibody (orange broken line; n=3; \* represents p=0.03). (C) Representative histogram of HLA-E expression on primary CLL cells. White histogram represents the Isotype control. The grey histogram represents HLA-E expression on CLL cells. (D) Summary of the cytotoxic activity of CLL CD19.CAR NK cells (orange) vs. CLL NT-NK cells (magenta lines) in the presence (solid line) or absence (dashed line) of NKG2A blocking antibody, as measured by 51Cr release assay, against K562 or primary CLL (n=3). (E) Summary of the cytotoxic activity of iC9/CAR.19/IL15-transduced CB-NK cells (orange) vs. NT CAR-NK cells (magenta lines) in the presence (solid line) or absence (dashed line) of NKG2A blocking antibody, as measured by 51Cr release assay, against K562 or primary CLL (n=3).

Supplementary Fig 2A

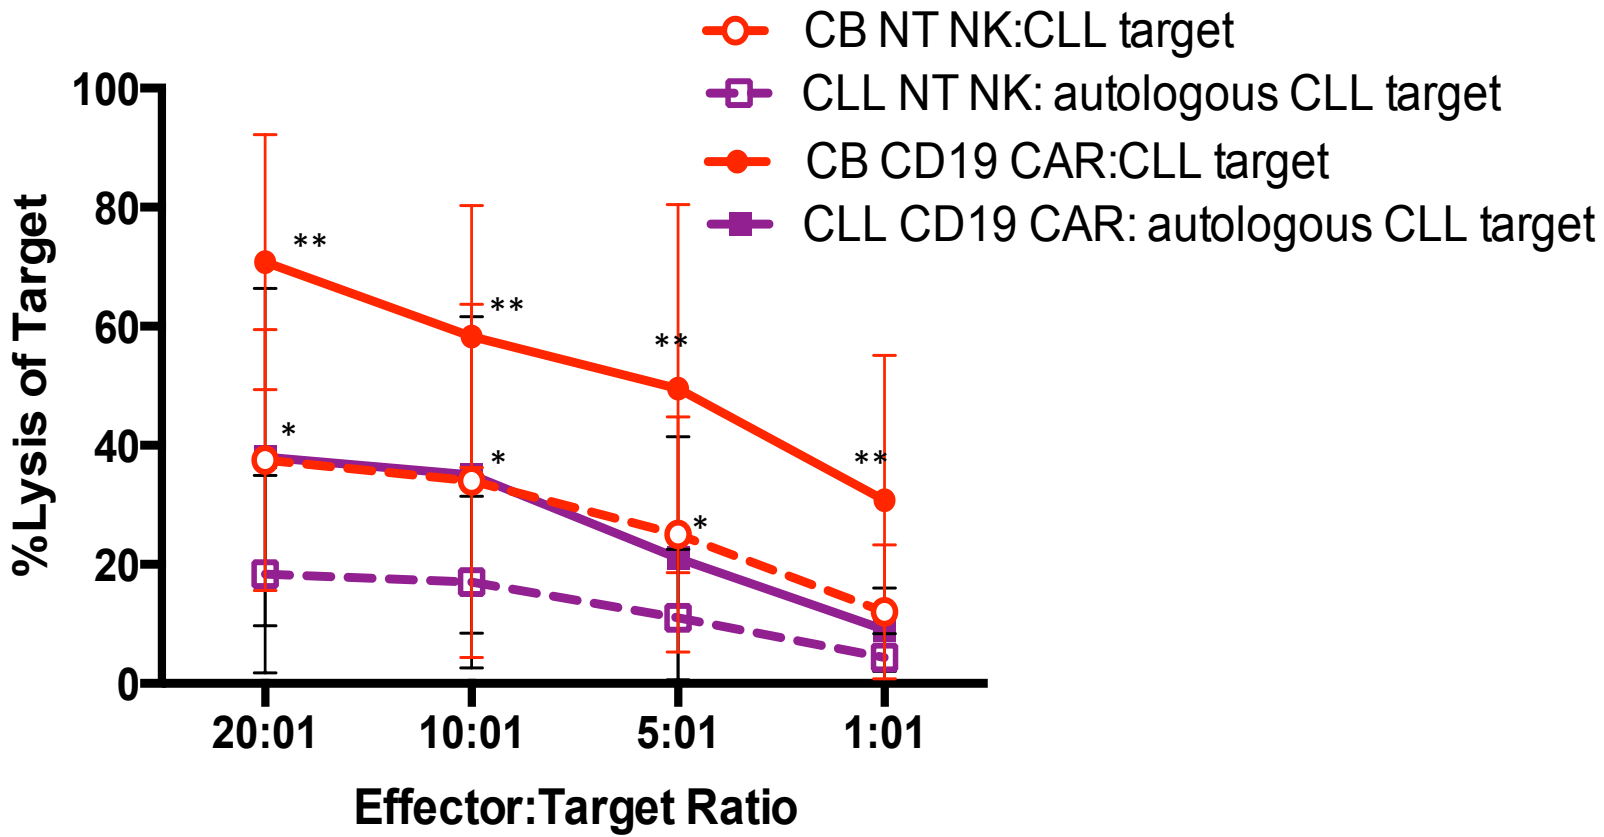

# Supplementary Fig 2B

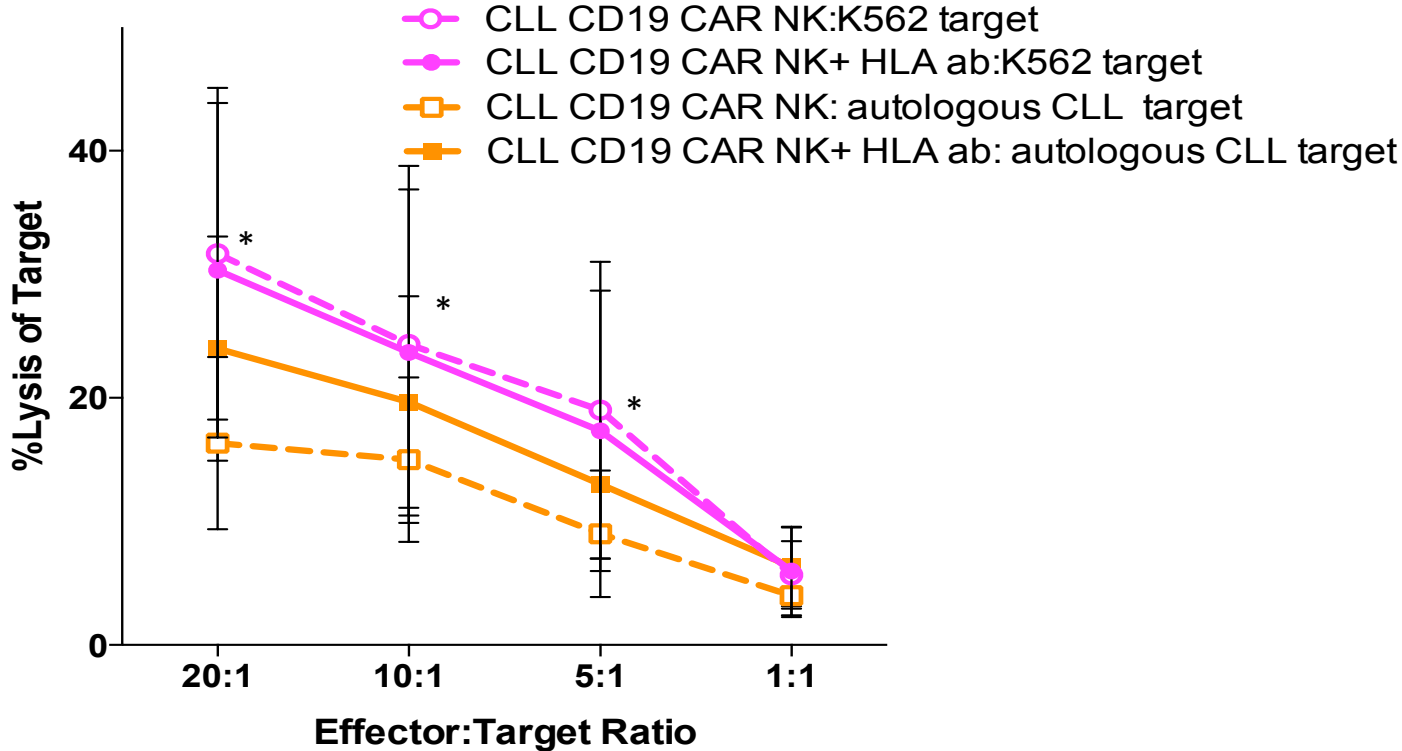

# Supplementary Fig 2C

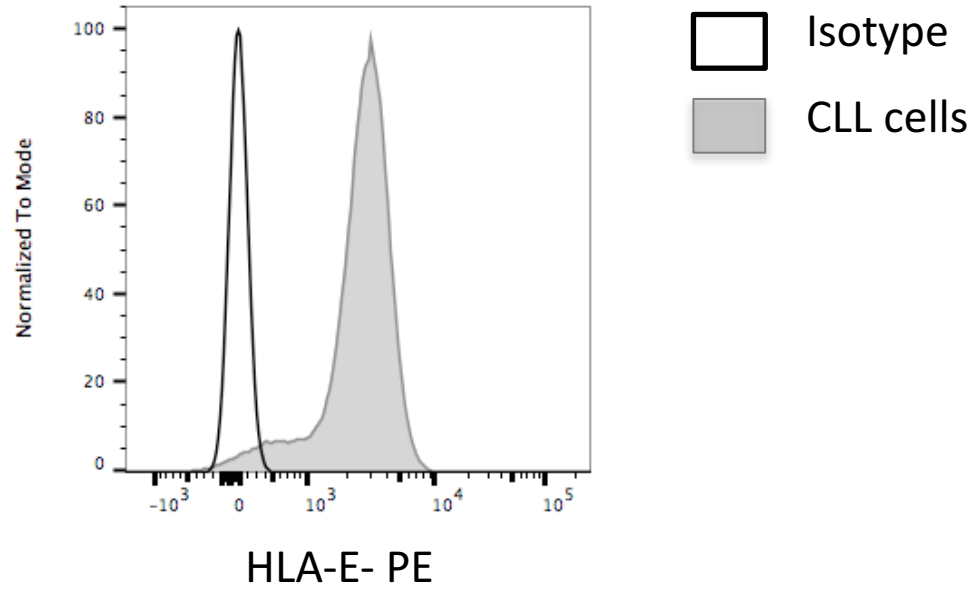

Supplementary Fig 2D

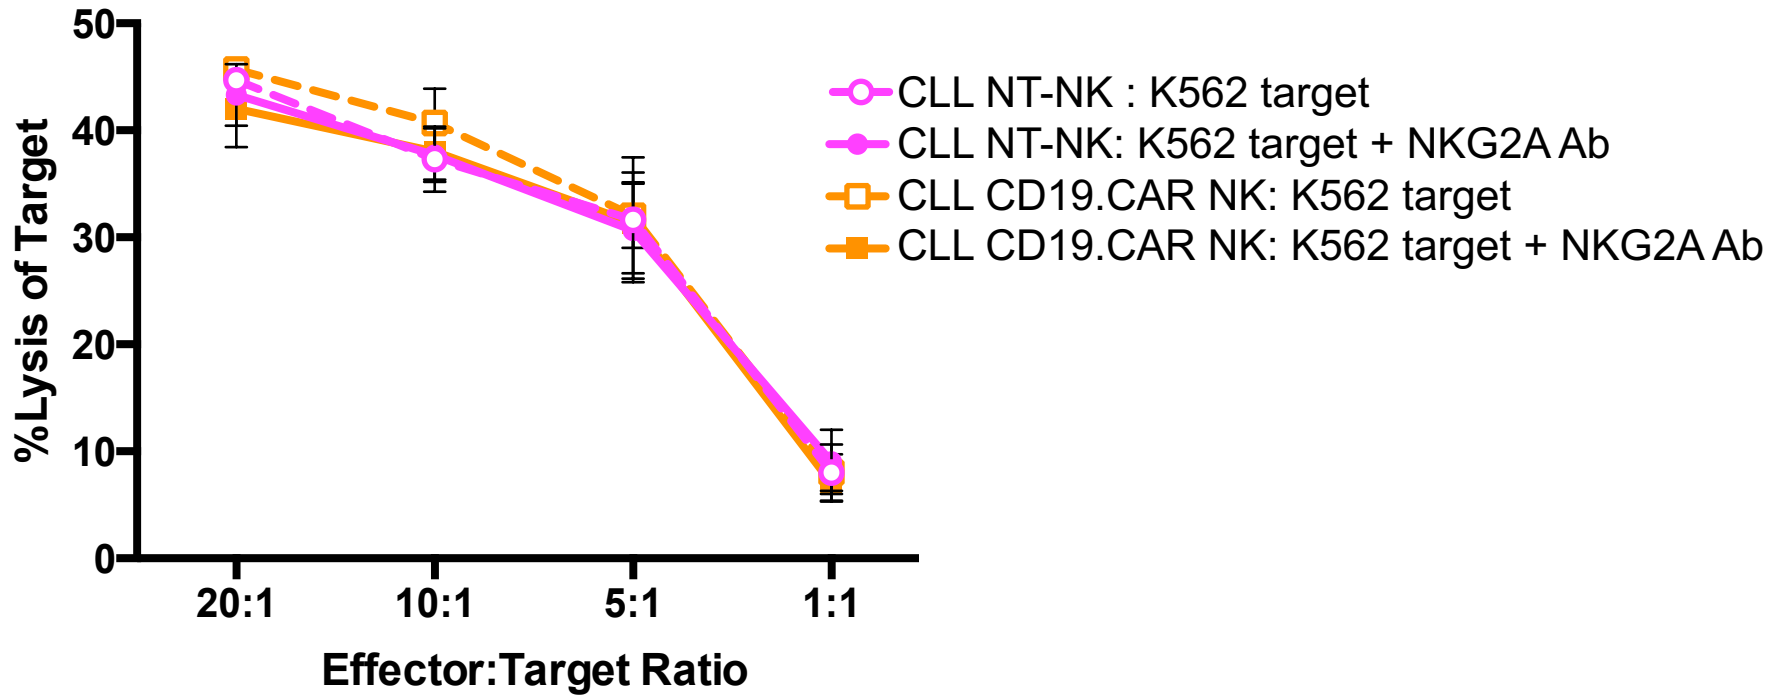

# Supplementary Fig 2D (cont)

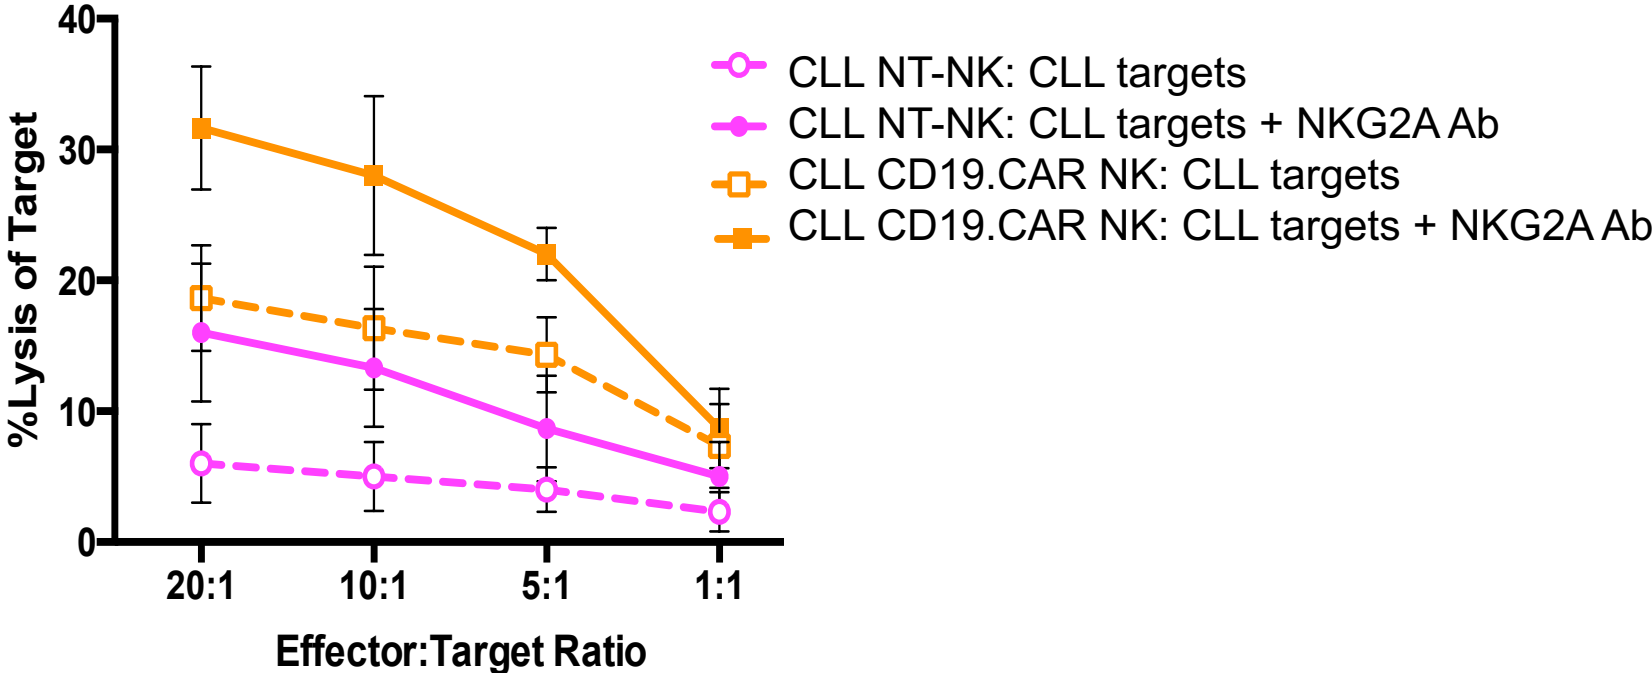

# Supplementary Fig 2E

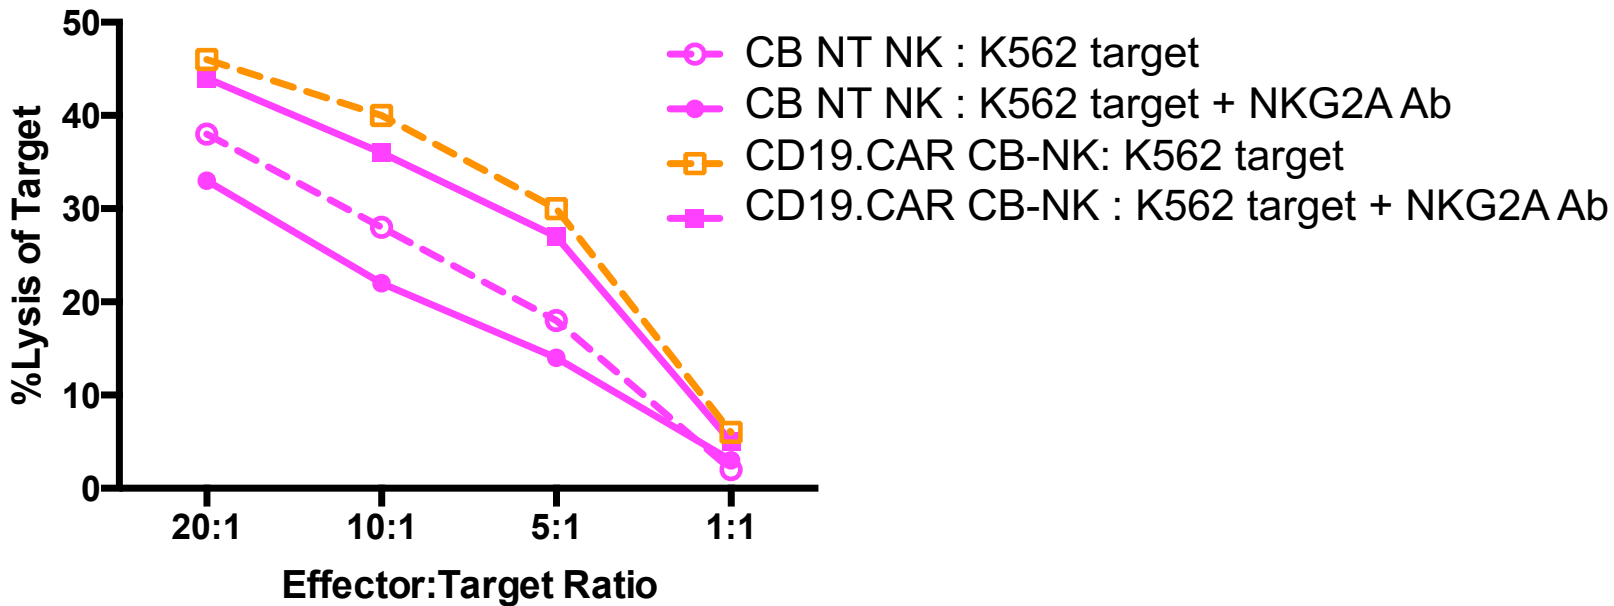

# Supplementary Fig 2E (Cont.)

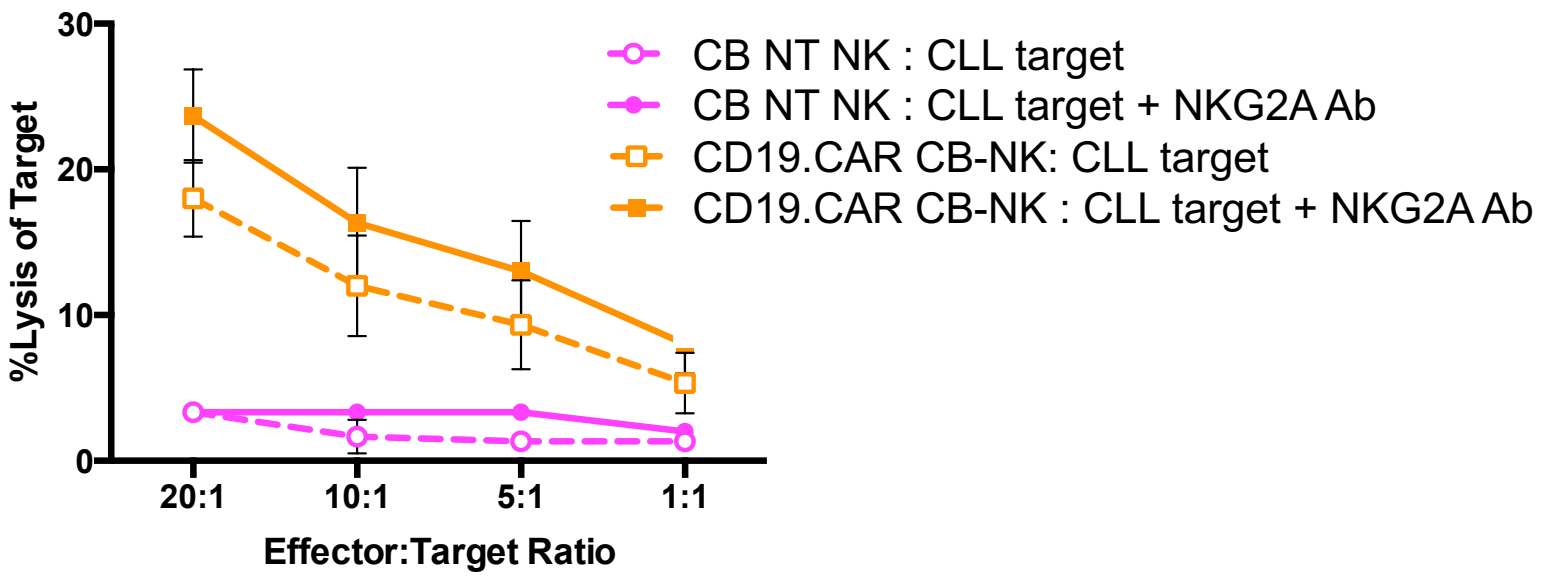

Supplement: 41375_2018_BFleu2017226_MOESM76_ESM.pdf [file 41375_2018_BFleu2017226_MOESM76_ESM.pdf]
