# Supplementary material for: Cord blood NK cells engineered to express IL-15 and a CD19-targeted CAR show long-term persistence and potent antitumor activity
Source: Springer Nature journal article supplement (doi:10.1038/leu.2017.226), 2017-07-20

**Supplementary Fig 1.** Stability of CAR expression by CB-NK cells transduced with the iC9/CAR.19/IL15 vector. **(A)** Frequencies of CAR-expressing NK cells generated from 18 different cord blood units as measured by flow cytometry. Samples were analyzed after 14 days of culture (Day 10 after transduction). **(B)** Frequencies of CAR expressing NK cells after 48 days in culture (6 independent experiments). **(C)** NK CAR transduction efficiency with iC9/CAR19/IL-15 or CAR19.

# Supplementary Fig 1A

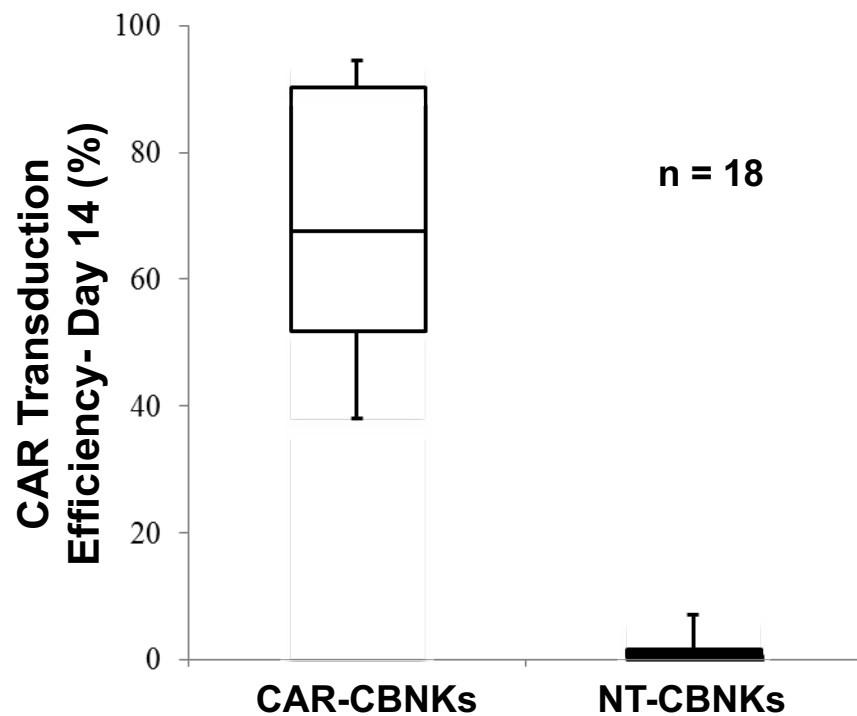

# Supplementary Fig 1B

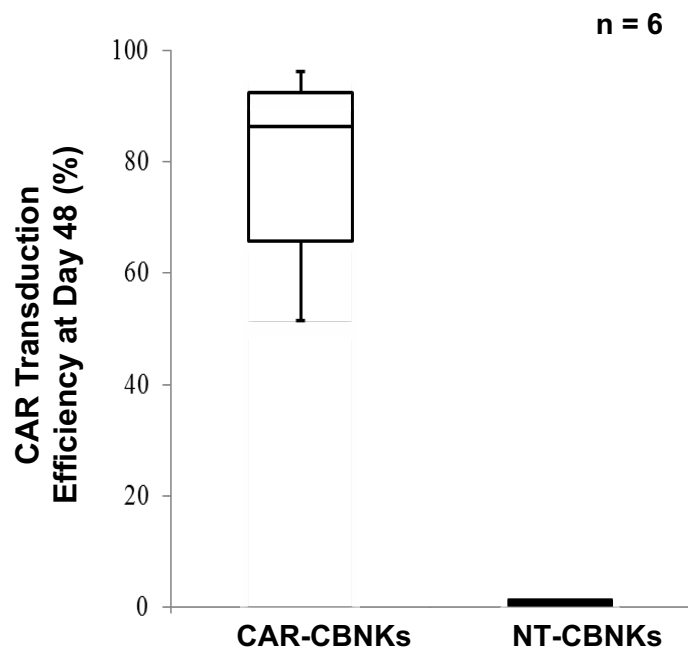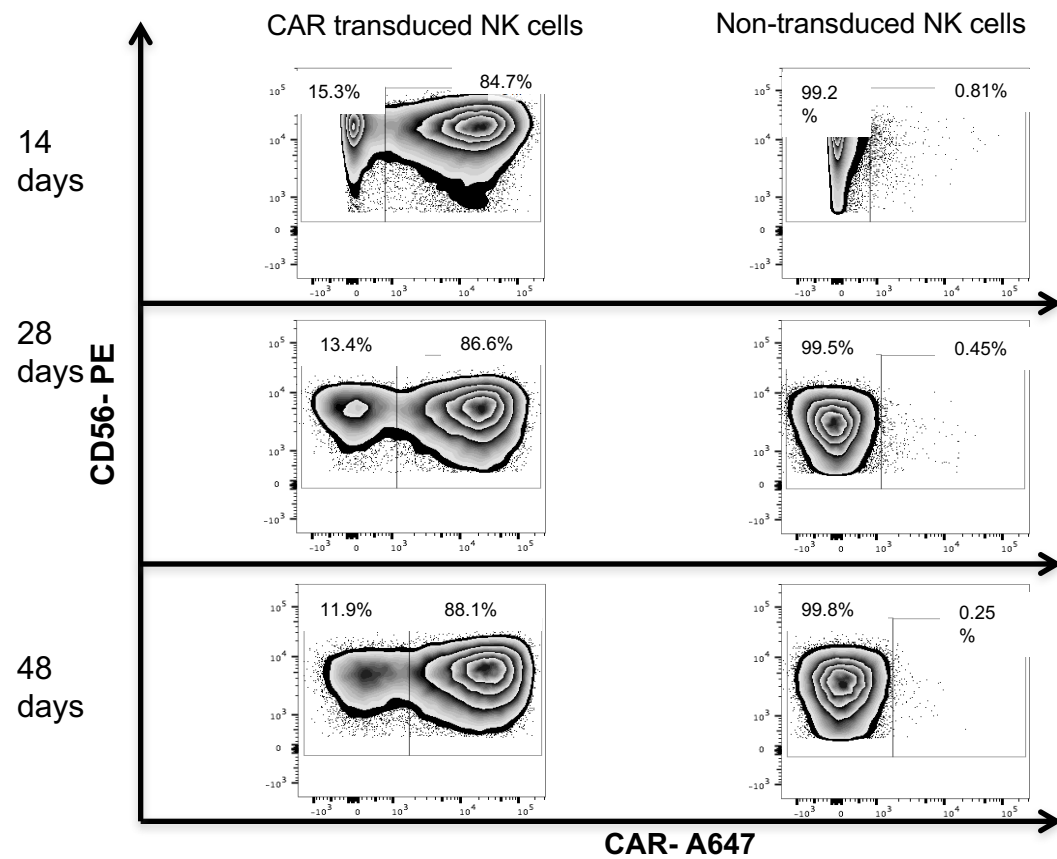

# Supplementary Fig 1C

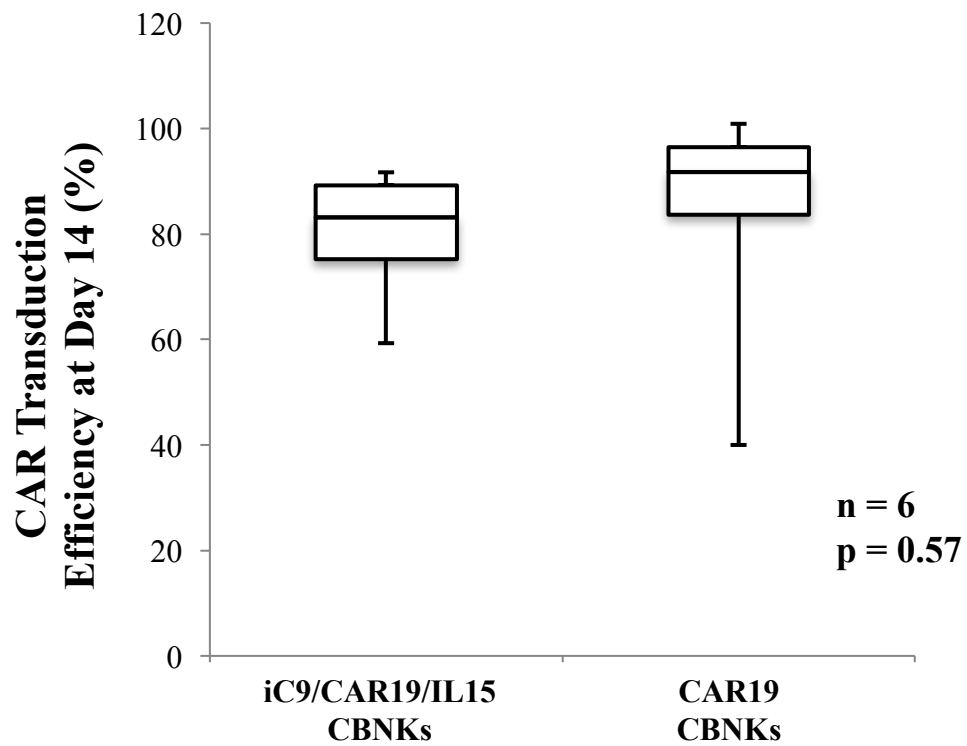

Supplement: 41375_2018_BFleu2017226_MOESM75_ESM.pdf [file 41375_2018_BFleu2017226_MOESM75_ESM.pdf]
