# Supplementary material for: Cord blood NK cells engineered to express IL-15 and a CD19-targeted CAR show long-term persistence and potent antitumor activity
Source: Springer Nature journal article supplement (doi:10.1038/leu.2017.226), 2017-07-20

**Supplementary Fig 3.** Confocal representative images (original magnification  $\times 100$ ) of immunological synapse in non-transduced (NT)-CB NK cells vs. iC9/CAR.19/IL15-transduced CB NK cells, CAR.19-transduced CB NK cells (without IL-15) and CLL patient-derived NK cells transduced with iC9/CAR.19/IL15 against CLL cells (left panels) (left) or K562 cells (right). Images including transmitted light (TL), single-color anti-F-actin (red), anti-perforin (green) and anti-pericentrin (yellow), with an overlay of all stains are presented.

# Supplementary Fig. 3

## CLL targets

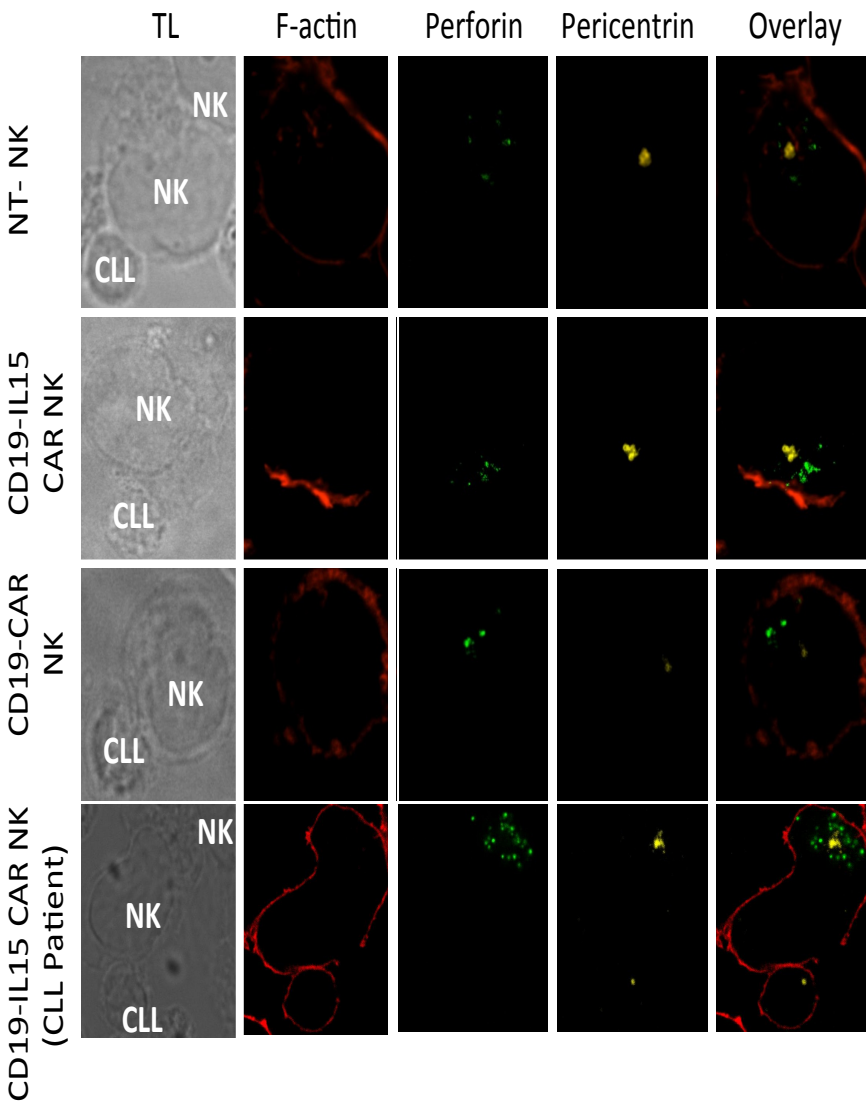

## K562 targets

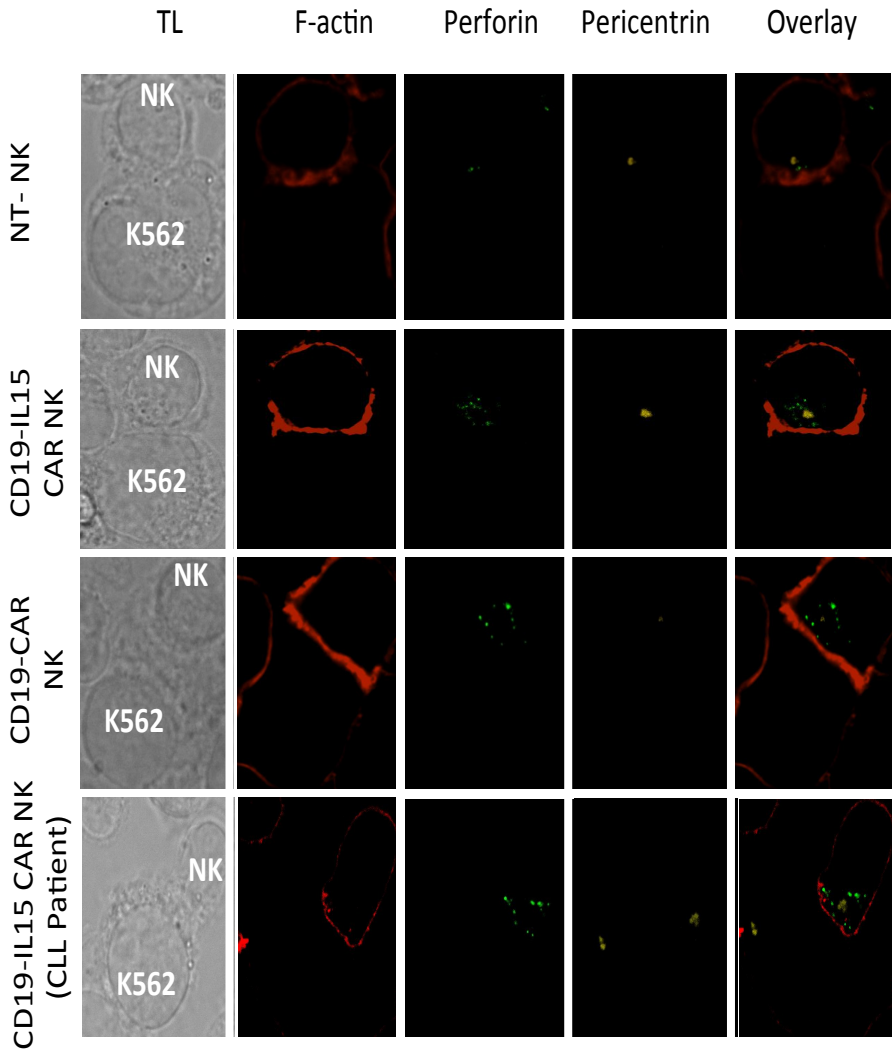

Supplement: 41375_2018_BFleu2017226_MOESM77_ESM.pdf [file 41375_2018_BFleu2017226_MOESM77_ESM.pdf]
