# Supplementary material for: Cord blood NK cells engineered to express IL-15 and a CD19-targeted CAR show long-term persistence and potent antitumor activity
Source: Springer Nature journal article supplement (doi:10.1038/leu.2017.226), 2017-07-20

**Supplementary Fig 4.** Proliferation of NT CB-NK cells or CAR transduced CB-NK cells cultured in the presence or absence of CLL targets for 24h, 48h or 72hs in 4 independent experiments.

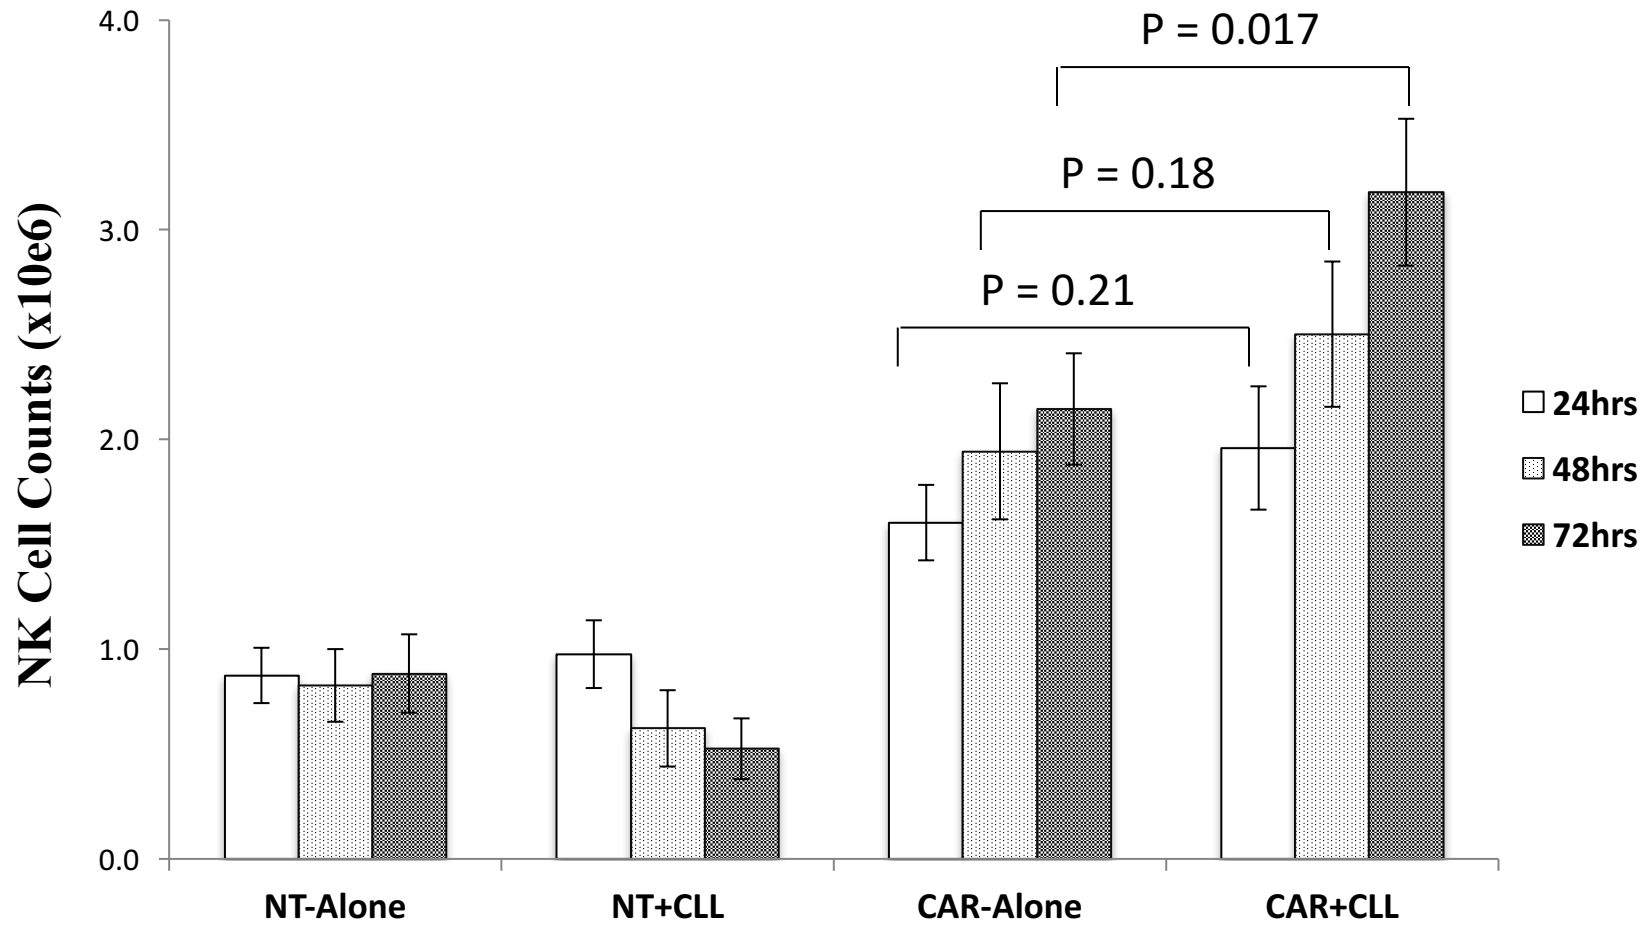

Supplement: 41375_2018_BFleu2017226_MOESM78_ESM.pdf [file 41375_2018_BFleu2017226_MOESM78_ESM.pdf]
