# Supplementary material for: Cord blood NK cells engineered to express IL-15 and a CD19-targeted CAR show long-term persistence and potent antitumor activity
Source: Springer Nature journal article supplement (doi:10.1038/leu.2017.226), 2017-07-20

**Supplementary Fig 5. CB-NK cell phenotype based on the expression of NK cell receptors, transcription factors, adaptor molecules, homing receptors and markers of exhaustion.** Cells were gated on live, single lymphocytes, doublets were excluded before gating on CD56+CD- NK cells. The percentages of positive cells were then calculated based on the FMO controls to compare the expression of markers on CB-NK cells prior to expansion (CB NK resting), ex vivo expanded NT NK cells (NT-NK), and the CAR-positive versus the CAR-negative fraction within the CAR expanded product (n=3 independent NK expansion and transduction experiments using different CB units).

Suppl  
Fig. 5

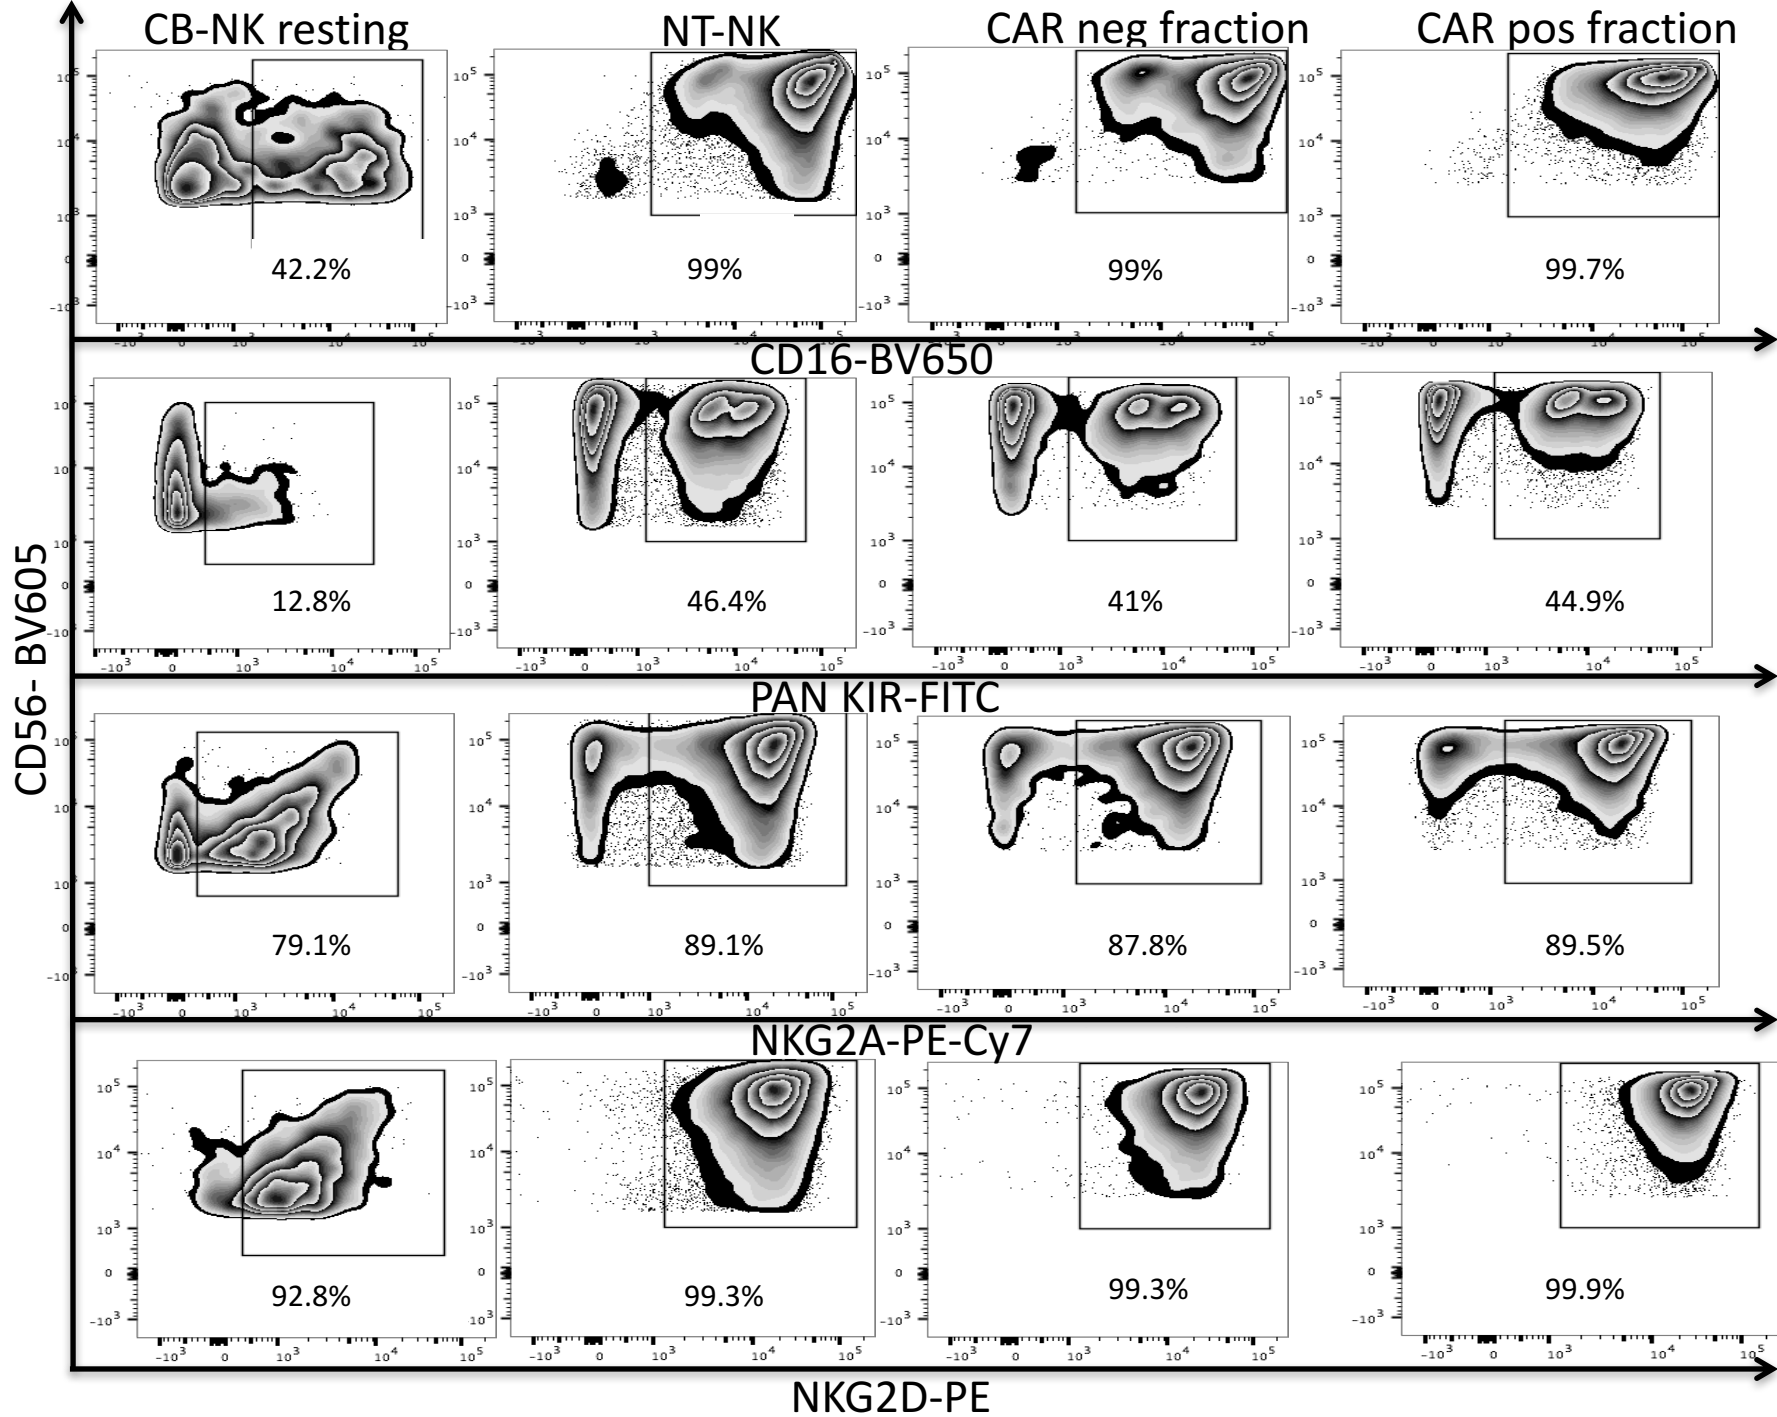

Suppl  
Fig. 5  
Cont

CD56- BV605

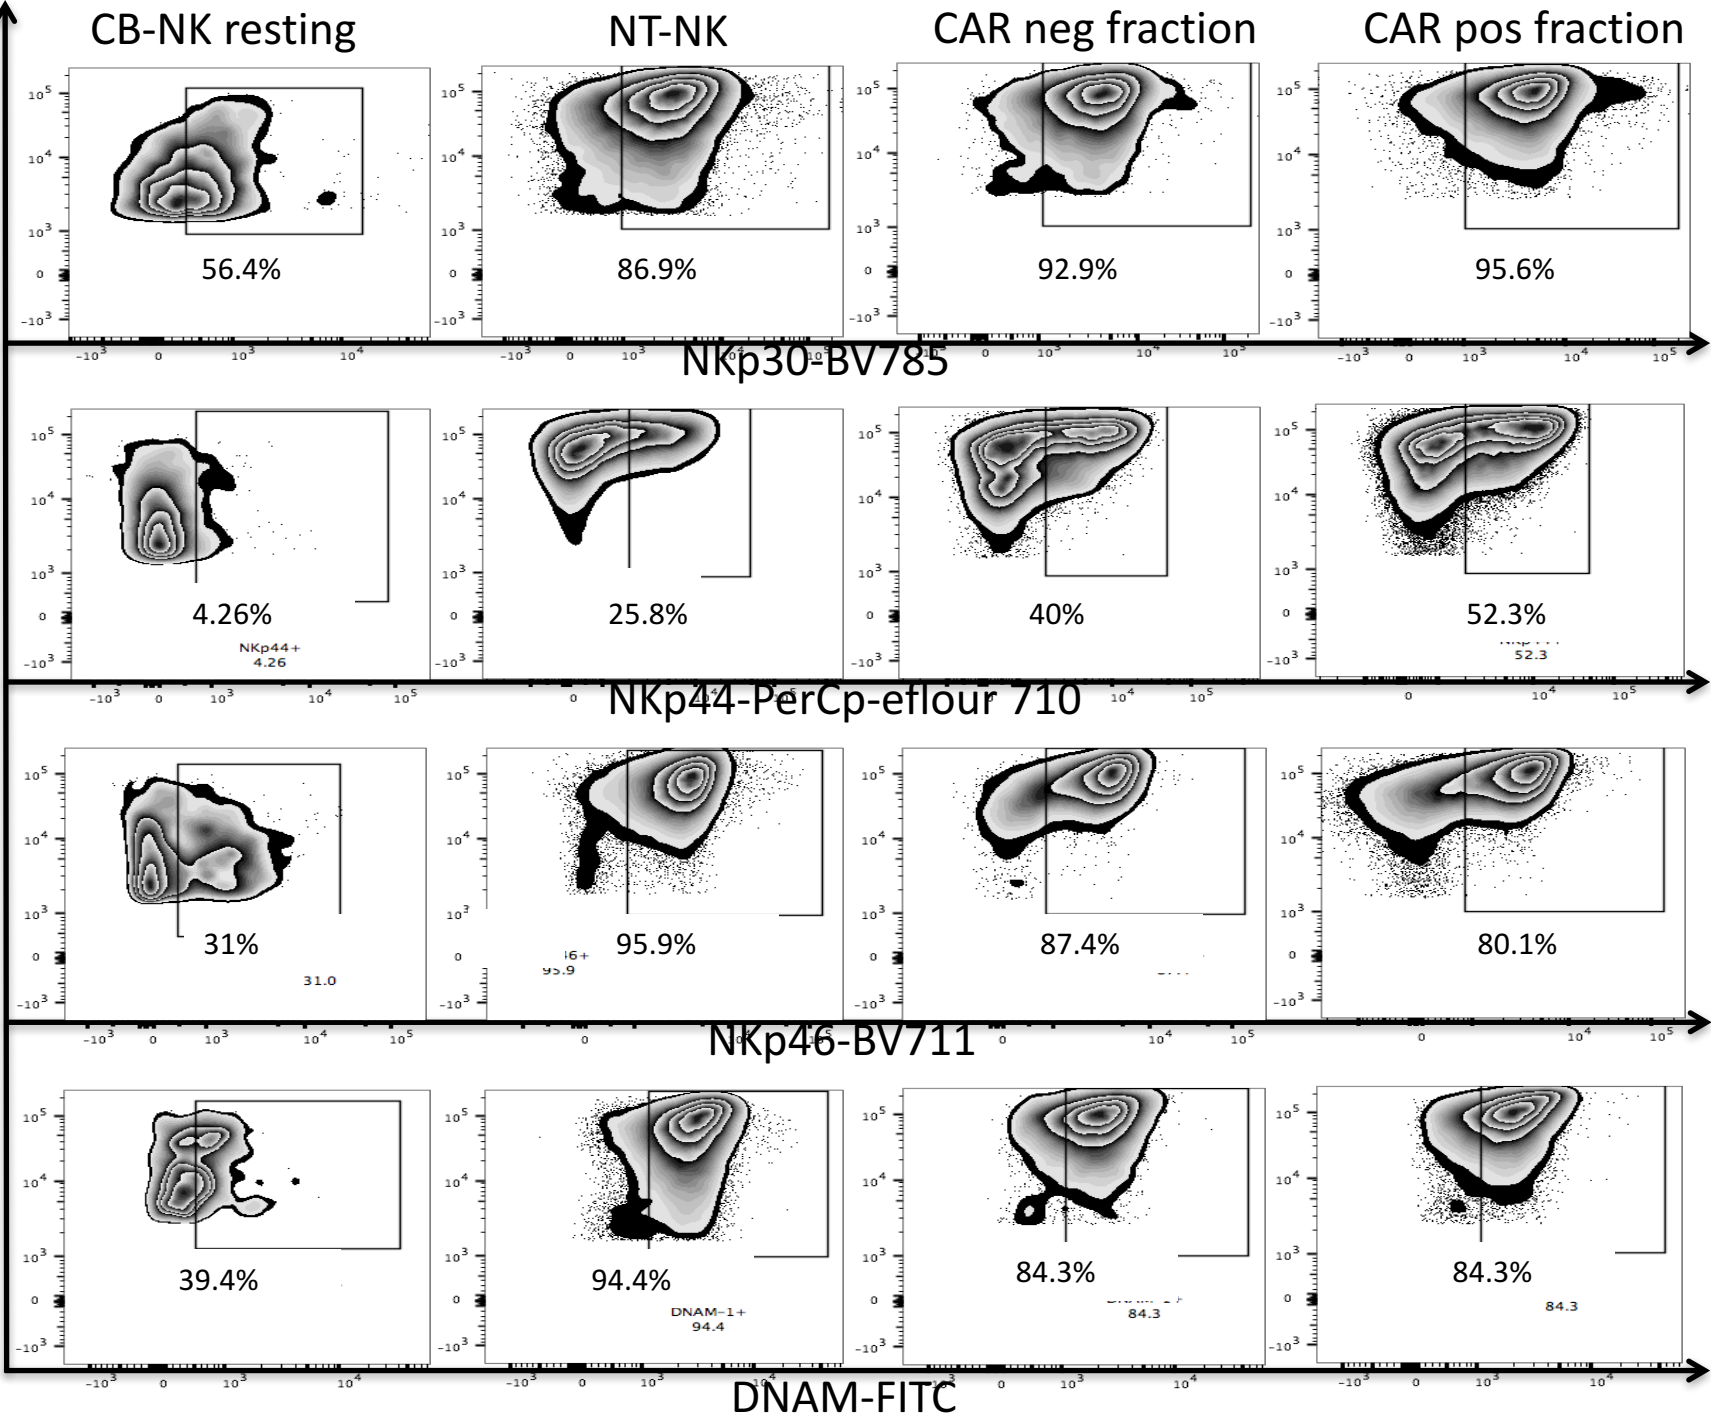

Suppl  
Fig. 5  
Cont

CD56- BV605

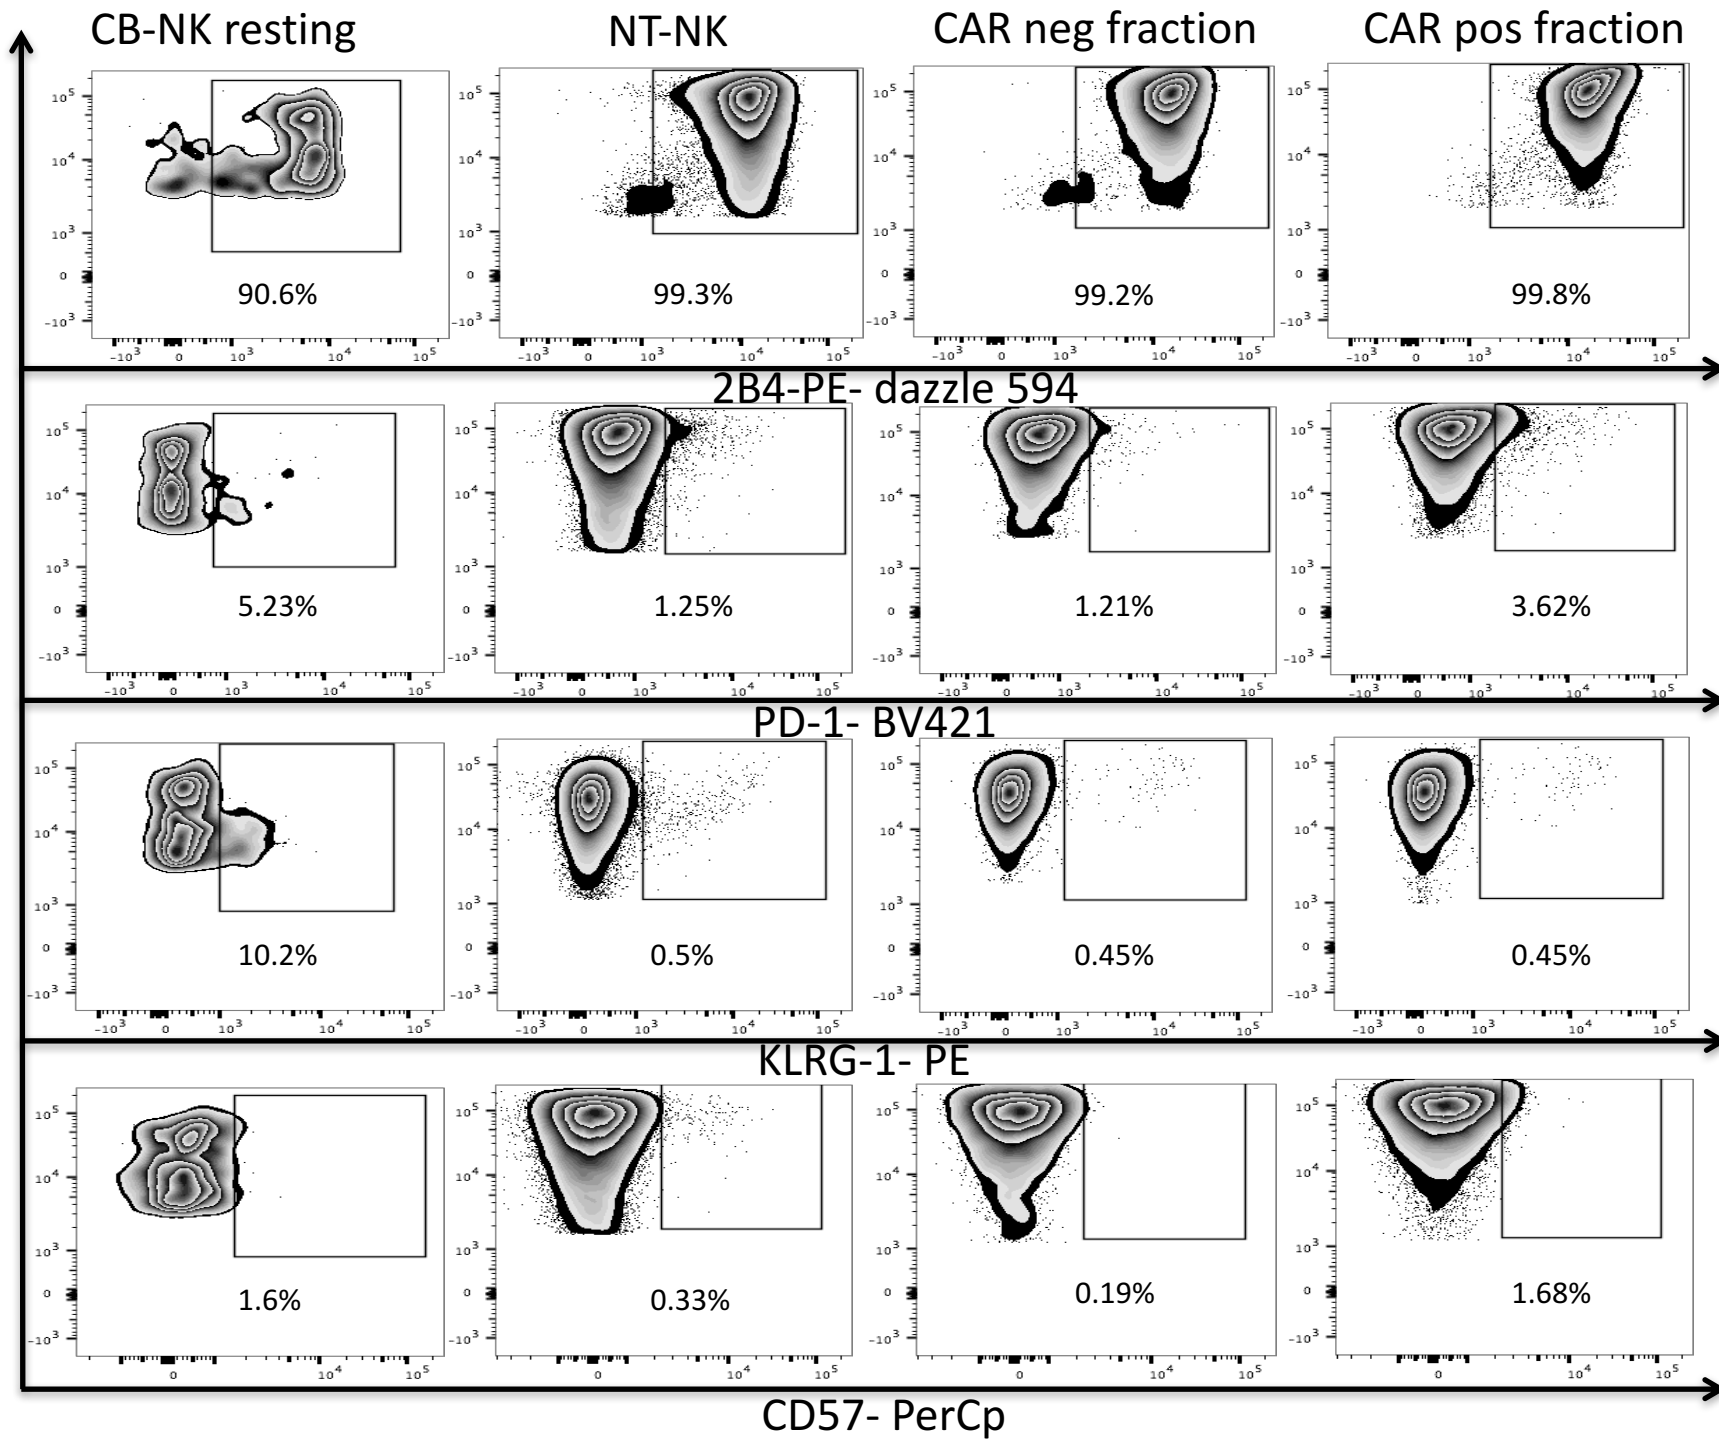

Suppl  
Fig. 5  
Cont

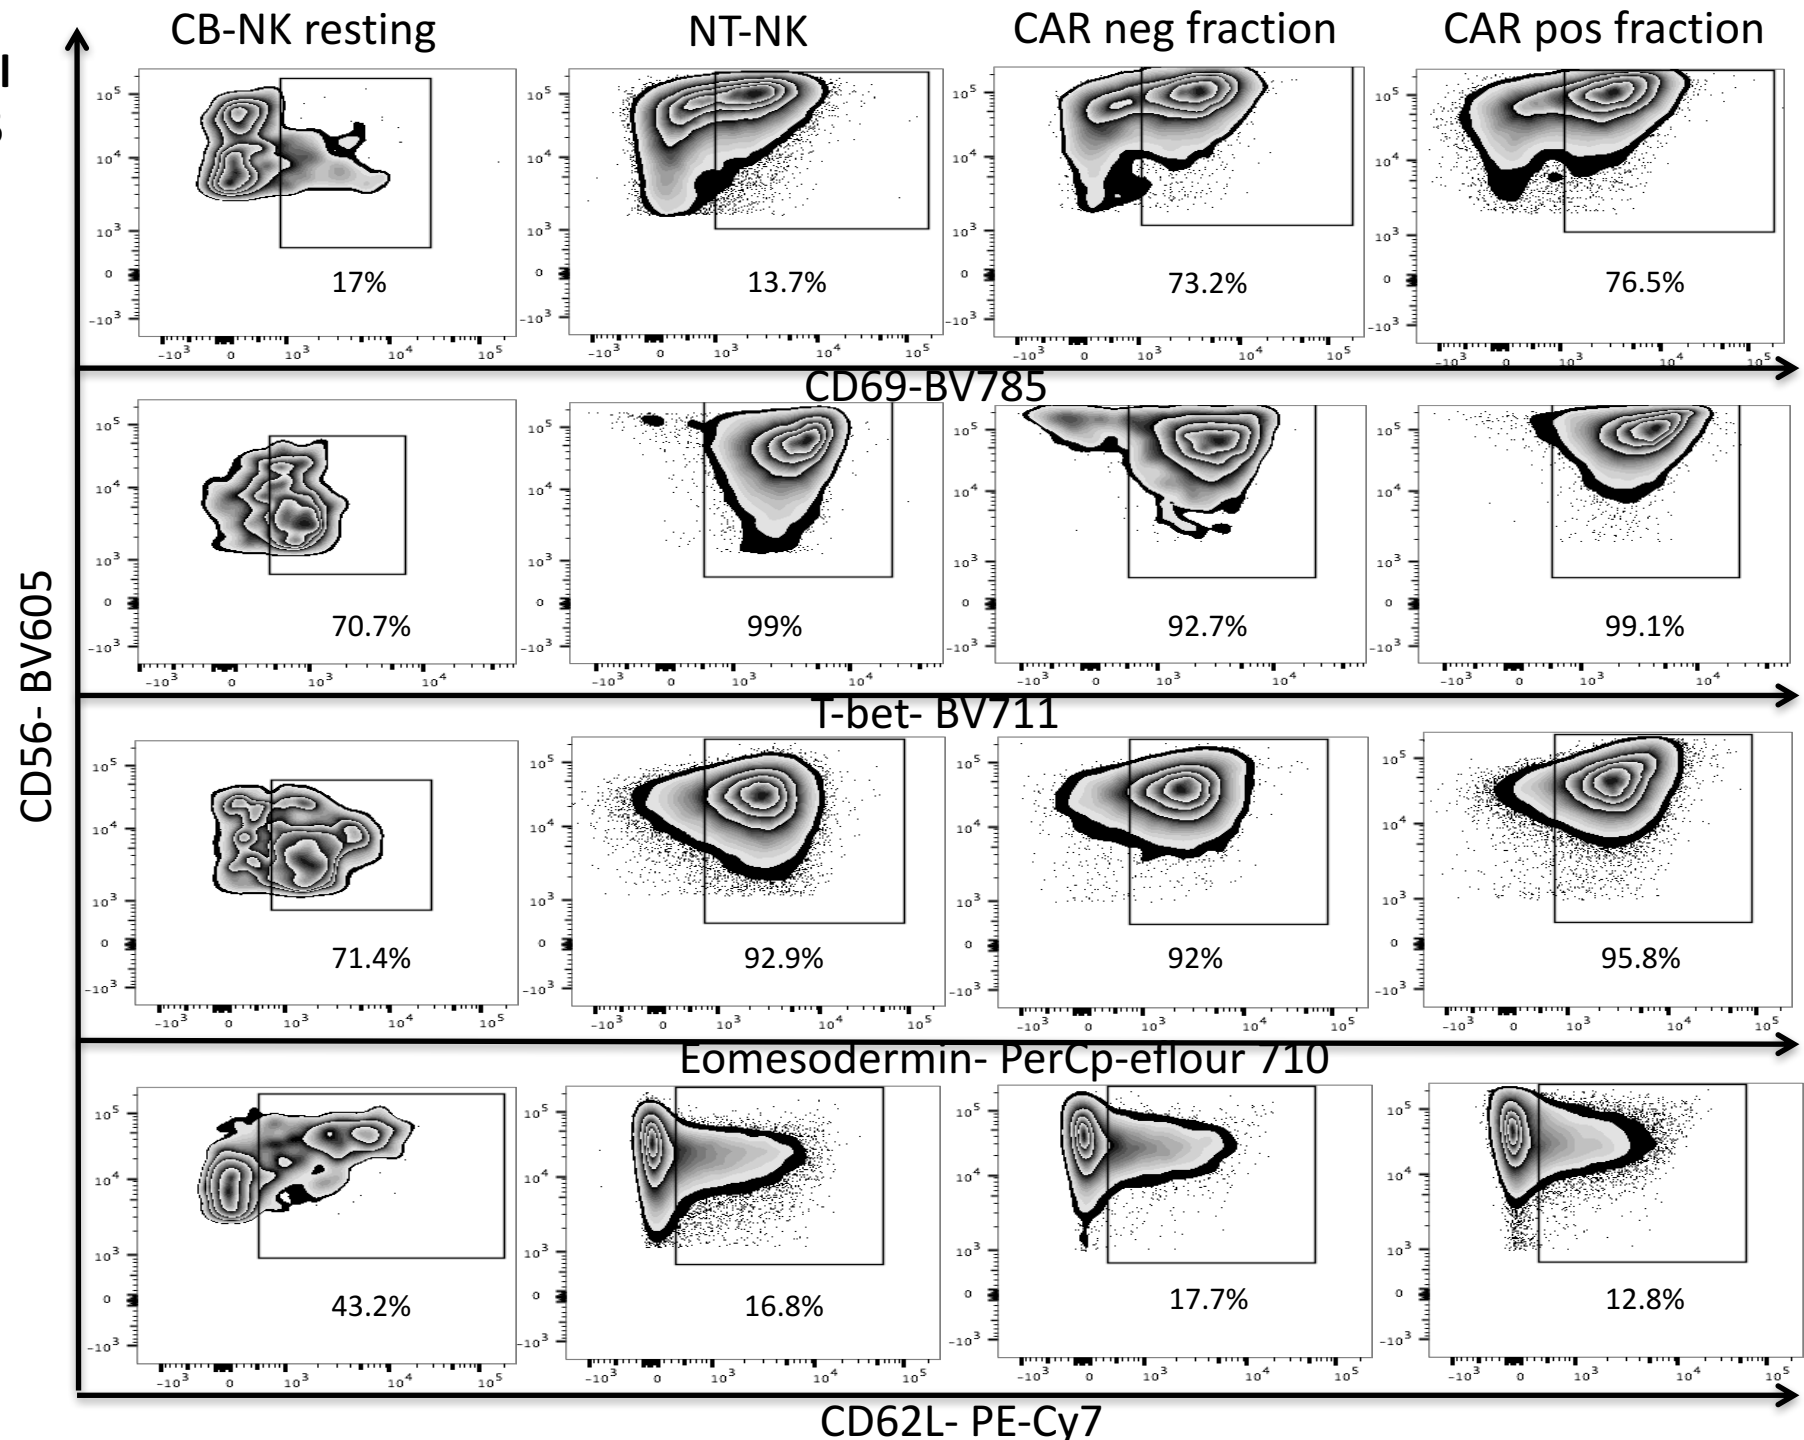

Suppl Fig. 5  
Cont

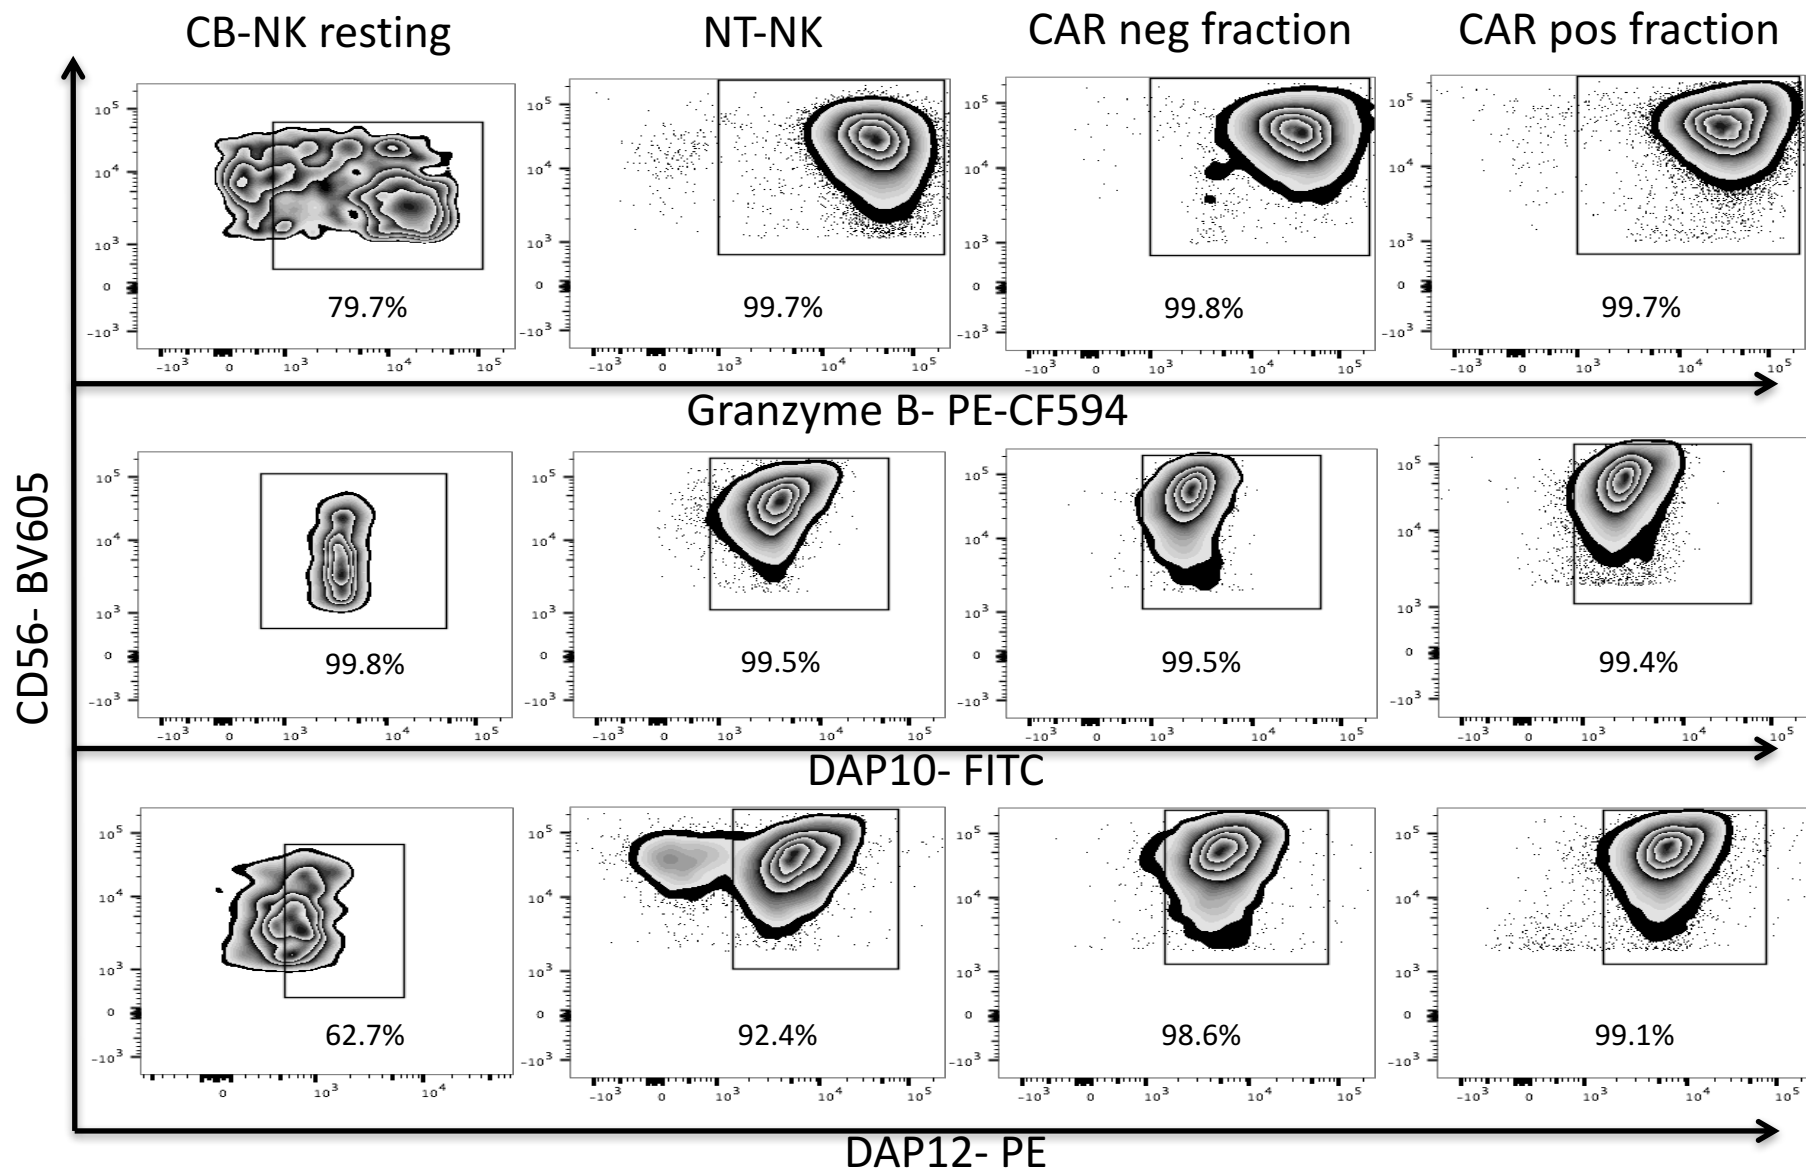

Suppl  
Fig. 5  
Cont

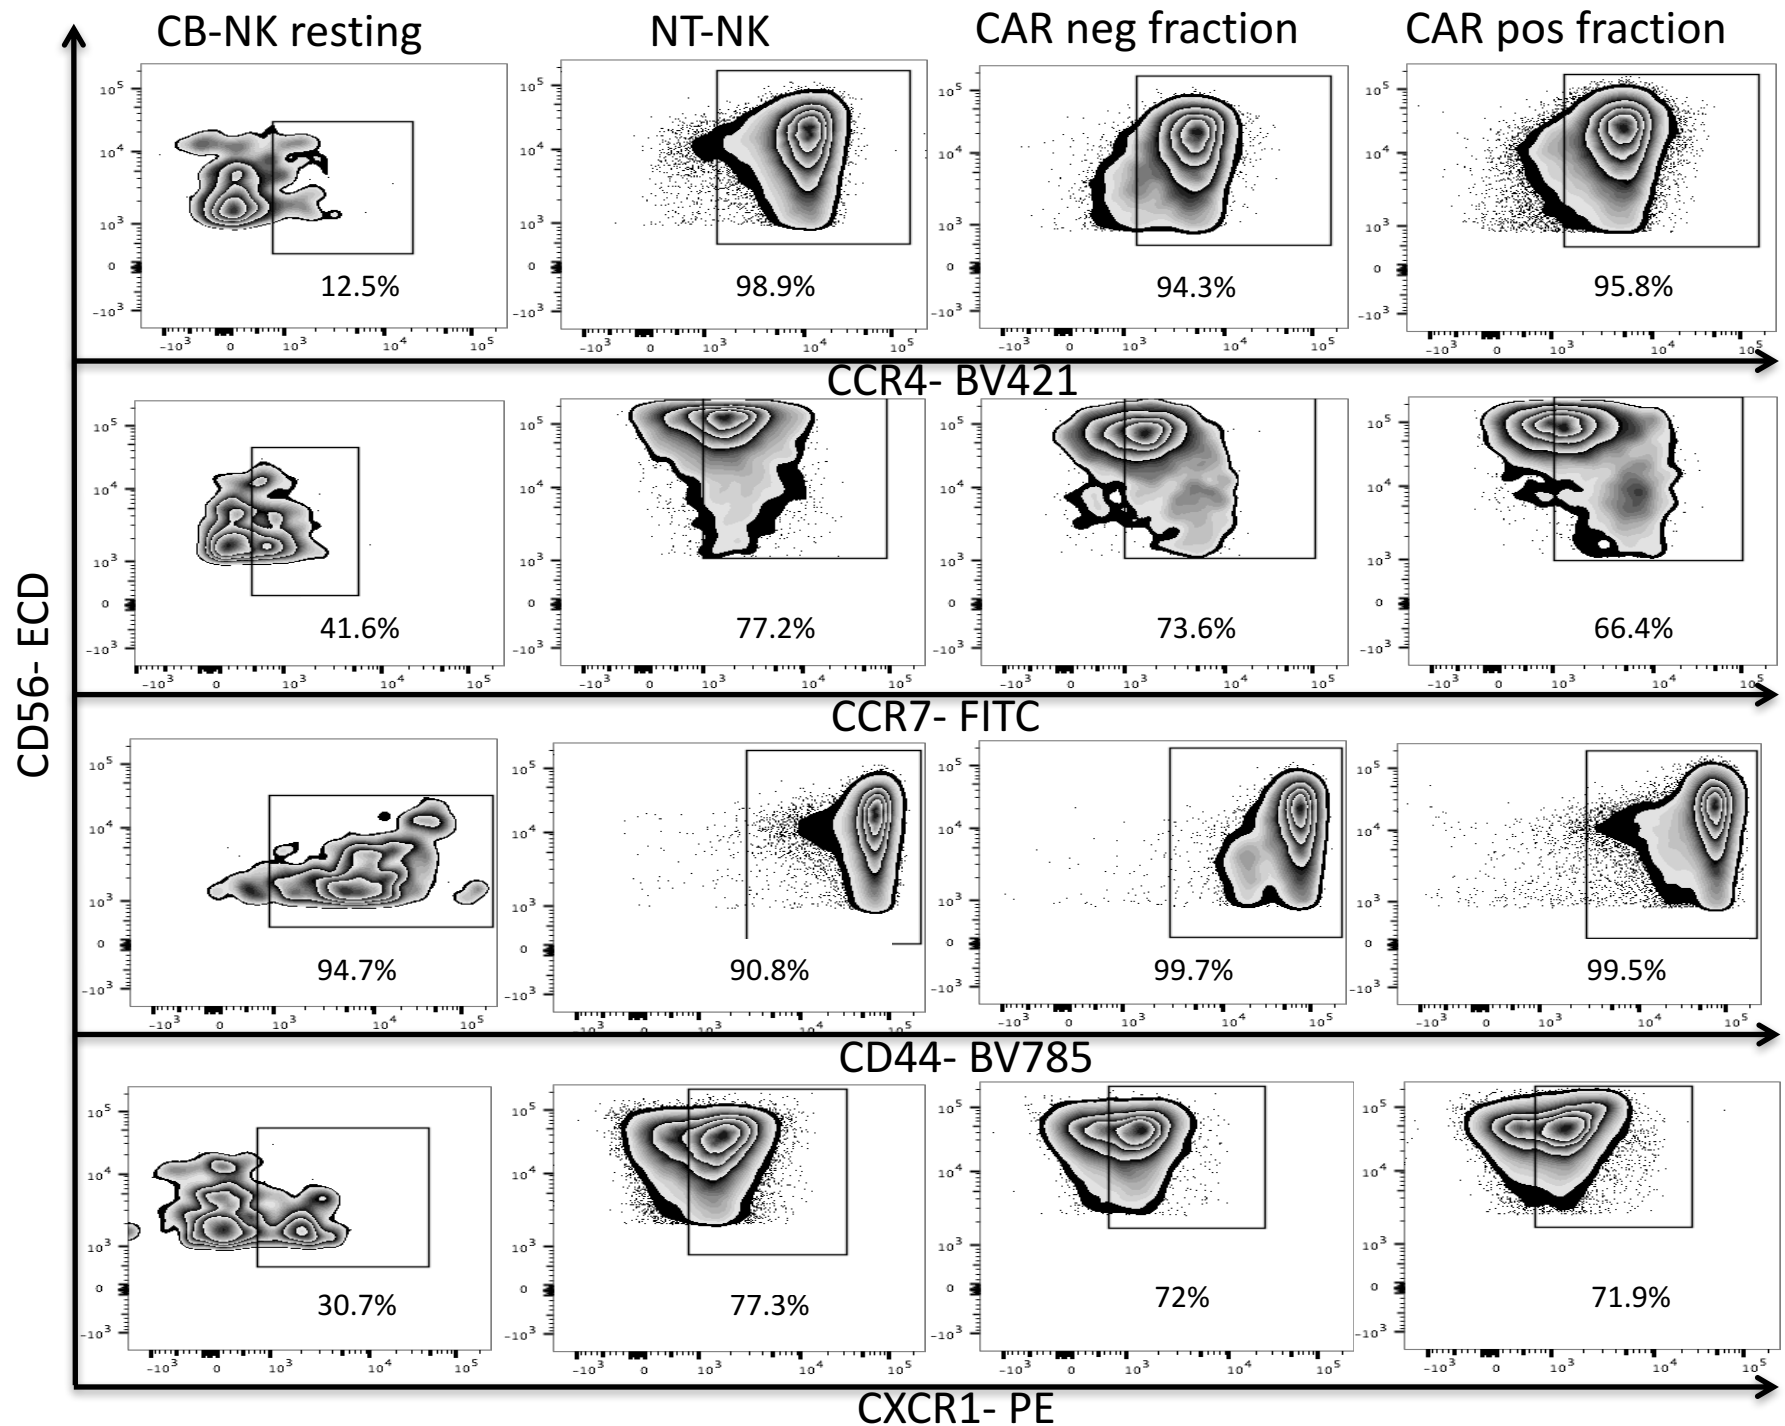

Suppl Fig. 5  
Cont

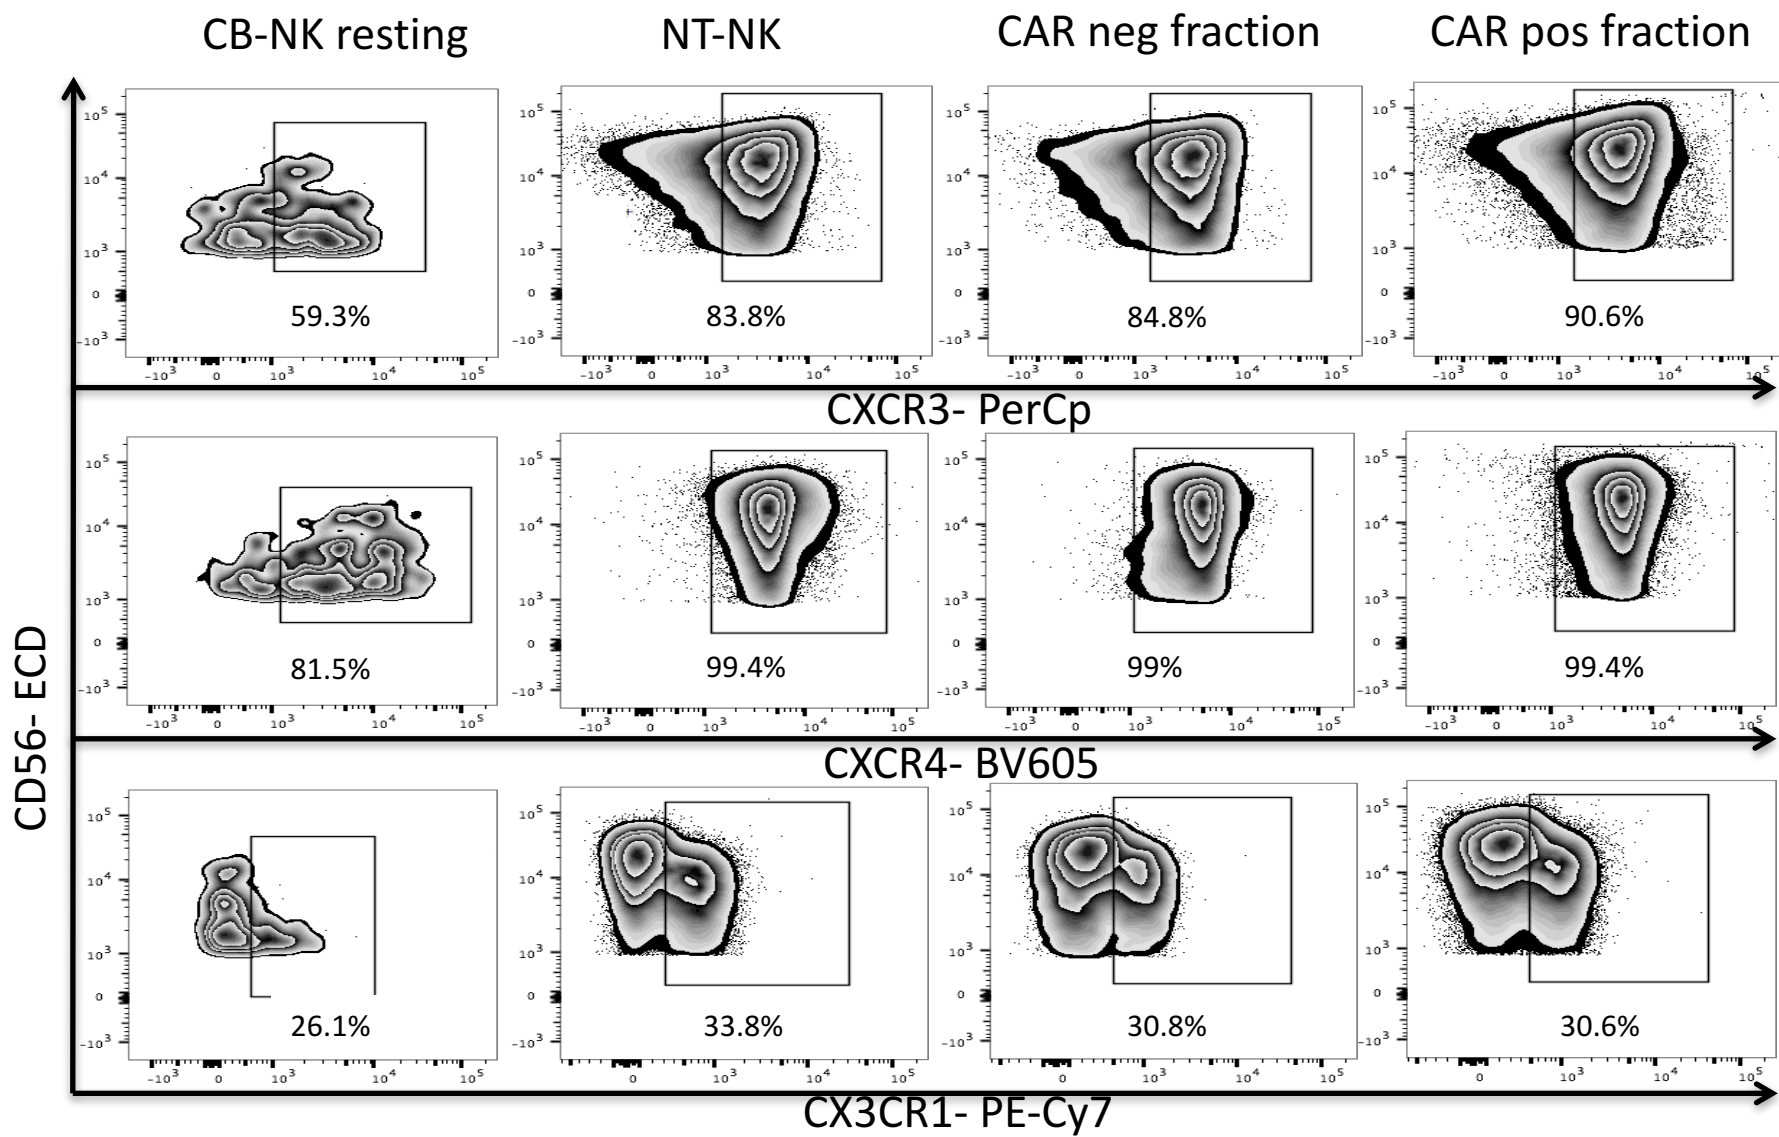

Supplement: 41375_2018_BFleu2017226_MOESM79_ESM.pdf [file 41375_2018_BFleu2017226_MOESM79_ESM.pdf]
