# Supplementary material for: Cord blood NK cells engineered to express IL-15 and a CD19-targeted CAR show long-term persistence and potent antitumor activity
Source: Springer Nature journal article supplement (doi:10.1038/leu.2017.226), 2017-07-20

**Supplementary Fig 6.** Comparison of in vivo persistence of **(A)** CAR-transduced CB NK cells (hCD45+CAR+CD56+CD3- frequencies) and **(B)** Raji tumor control (hCD45+CD19+ frequencies) in serial PB samples collected from mice and measured by flow cytometry.

# Supplementary Fig 6

- Raji only
- Raji + CAR19 CB-NK cells
- Raji + CAR19 CB-NK cells + exogenous IL-15
- Raji + iC9/CAR19/IL-15 CB NK cells

**A**

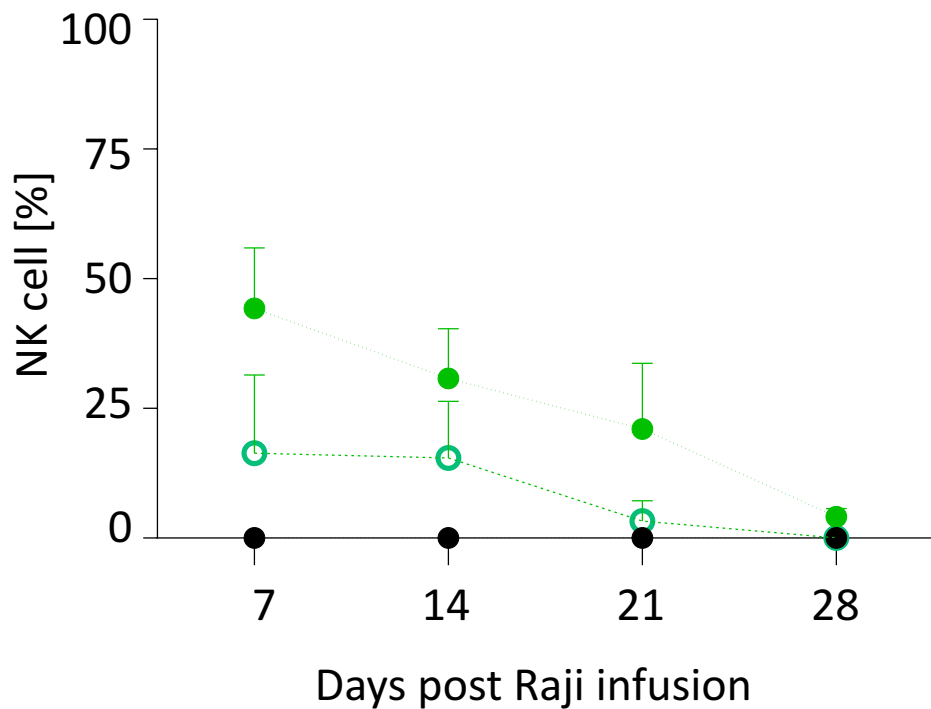

**B**

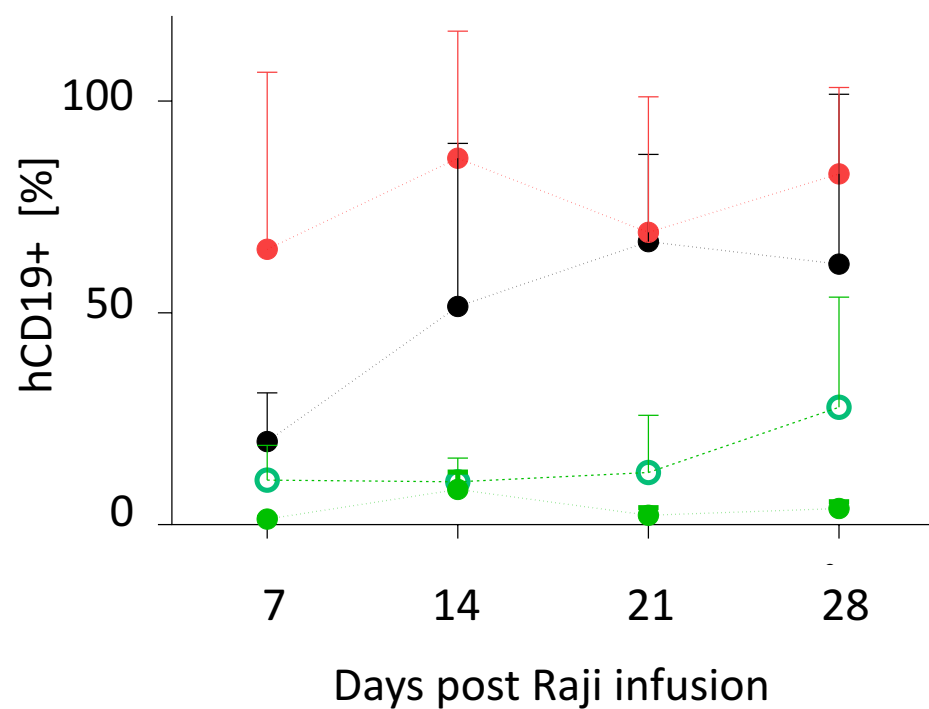

Supplement: 41375_2018_BFleu2017226_MOESM80_ESM.pdf [file 41375_2018_BFleu2017226_MOESM80_ESM.pdf]
